# Supplementary material for: The bacterial DNA repair protein Mfd confers resistance to the host nitrogen immune response
Source: PubMed Central journal article supplement (PMC4951645; doi:10.1038/srep29349), 2016-07-20
Supplement: srep29349-s1.pdf [file srep29349-s1.pdf]

**The bacterial DNA repair protein Mfd confers resistance to the host nitrogen immune response**

Elisabeth Guillemet<sup>1</sup>, Alain Leréec<sup>1</sup>, Seav-Ly Tran<sup>1@</sup>, Corinne Royer<sup>2</sup>, Isabelle Barbosa<sup>1#</sup>,  
Philippe Sansonetti<sup>3</sup>, Didier Lereclus<sup>1</sup> and Nalini Ramarao<sup>1\*</sup>

<sup>1</sup>Micalis Institute, INRA, AgroParisTech, Université Paris-Saclay, 78350 Jouy-en-Josas, France

<sup>2</sup>INRA, UMR 203, 11 Av J. Capelle, 69621 Villeurbanne, France

<sup>3</sup>INSERM U786, Institut Pasteur, 28 rue du Dr Roux, 75724 Paris Cedex 15, France

<sup>@</sup>Present address: Institute of Food Research, Norwich Research Park, and Norwich Medical School, University of East Anglia, NR4 7UA-7TJ, Norwich, UK

<sup>#</sup> Present address: ENS, UMR81, Paris, France

\*Correspondence should be addressed to: Nalini Rama Rao, INRA, Unité MICALIS UMR-1319, Domaine de Vilvert, 78350 Jouy en Josas, France.

Tel: 00 33 1 34 65 28 63. E-mail: nalini.ramarao@jouy.inra.fr

**Fig S1.** *B. cereus* wild type and  $\Delta mfd$  mutant strains were inoculated in LB medium at a starting optical density (OD) of 0.07 and grown at 25°C with agitation. The OD was measured every hour at 600 nm. This graph represents representative growth curves out of at least five independent experiments.

**Fig S2.** 100 cfu of *B. cereus* wild-type (Bc 407),  $\Delta mfd$  mutant ( $\Delta mfd$ ), the  $\Delta mfd$  mutant complemented with *mfd* (Bc  $\Delta mfd / mfd^+$ ) and the  $\Delta mfd$  mutant harboring a plasmid carrying the *spoVT* gene ( $\Delta mfd/spoVT^+$ ) were injected into the hemocoel of *B. mori* larvae. Insect mortality was recorded 24 h post infection. The results are mean values of at least three independent experiments.

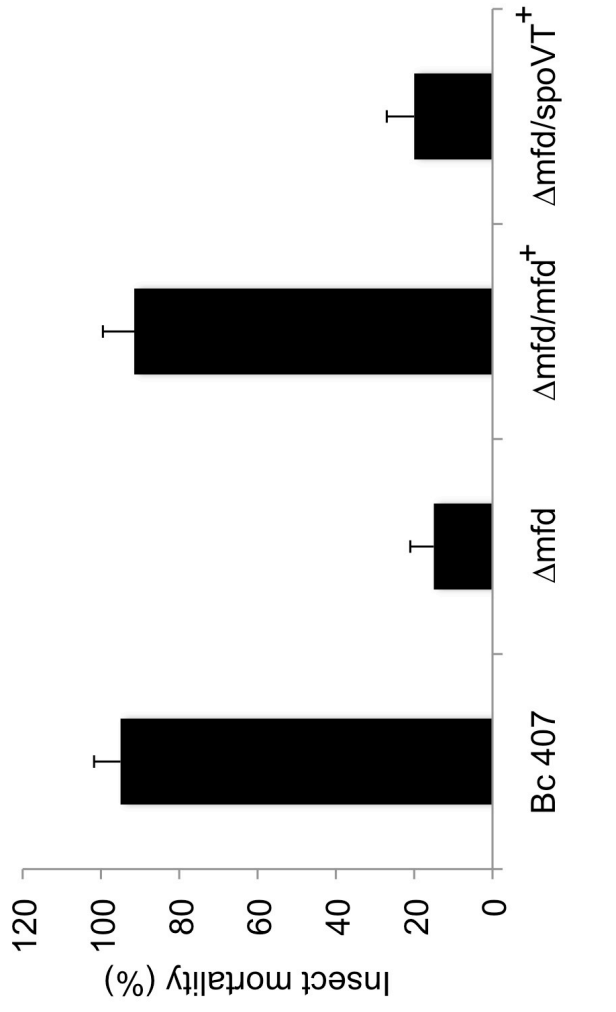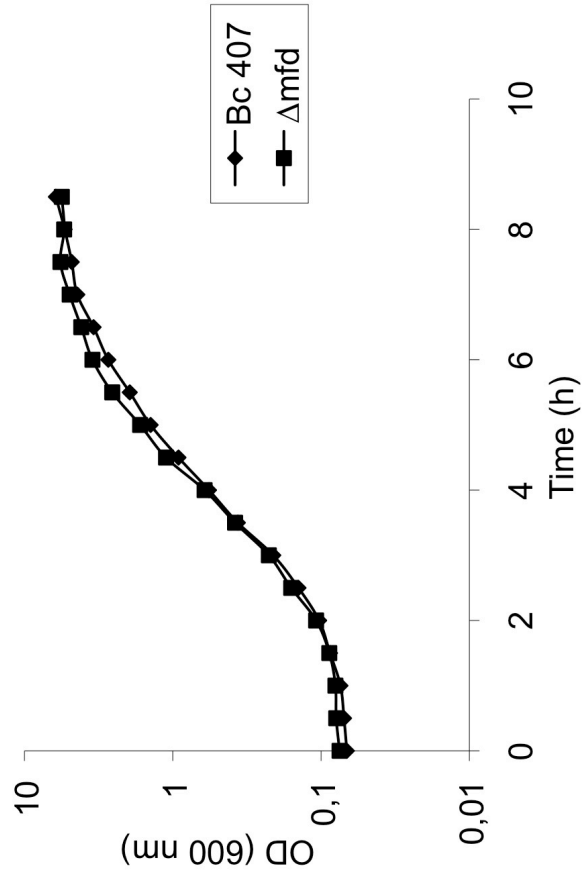

Figure S1

Figure S2
